# Supplementary material for: The activity of the HIV-1 IRES is stimulated by oxidative stress and controlled by a negative regulatory element
Source: PubMed Central journal article supplement — Nucleic Acids Res. 2010 Oct 8;39(3):902–12. doi: 10.1093/nar/gkq885 (PMC3035469; doi:10.1093/nar/gkq885), 2010-10-08
Supplement: supp_gkq885_SupplementaryData.pdf [file supp_gkq885_SupplementaryData.pdf]

## **Supplementary Material and Methods**

*Plasmid construction.* The reporter pFRT-IRES-HIV was derived from pDual-HIV(-1) (1) that contains the Rluc and Fluc coding sequences separated by HIV-1 frameshift region. Replacement of the frameshift region by the 5'UTR of HIV-1 was made in several steps. First, the AflIII restriction site located near the T7 sequence of pDual-HIV(-1) was deleted to facilitate subsequent cloning. A PCR fragment was amplified using the  $\Delta$ AflIII-SpeI(+) and  $\Delta$ AflIII-HindIII(-) primers, which were inserted in the SpeI and HindIII sites of pDual-HIV(-1) to produce pDual-HIV(-1) $\Delta$ AflIII. Next, the beginning of the HIV-1 5'UTR contained in pTAR (2) was amplified by PCR using the TAR-Kpn-uag(+) and TAR-Kpn(-) primers and cloned in the KpnI restriction site of pDual-HIV(-1) $\Delta$ AflIII located between Rluc and Fluc coding sequences. This PCR introduced three stop codons to terminate the Rluc coding sequence. The rest of the 5'UTR was amplified directly from a proviral molecular clone of HIV-1 group M subtype B (pLAI) (4). The initiation codon for Fluc expression is located within the 5'UTR IRES and the context of the AUG encompassing 30 nt from the Gag sequence was included. A peptide linker (GGGGSGGGGS) was inserted by PCR immediately upstream of the Fluc coding sequence. The first half of the linker was inserted using PCR amplification on pLAI with the 5'UTR-AflIII(+) and 5'UTR-BamHI(-) primers and the second half of the linker with the 5'UTR(+) and Linker-BamHI(-) primers. The linker was cloned in the AflIII and BamHI restriction sites of pDual-HIV(-1) $\Delta$ AflIII-TAR to generate pDual-IRES-HIV. This last step removed the frameshift region originally present in pDual-HIV(-1). Finally, we cut the fragment containing the Rluc coding sequence, the 5'UTR region of HIV-1 RNA and the Fluc coding sequence, using PmeI and ApaI restriction sites. This fragment was inserted into pcDNA5FRT (Invitrogen) previously linearized with SciI and ApaI to produce pFRT-IRES-HIV. Prior to this last cloning step, the KpnI and BamHI restriction sites from pcDNA5FRT were eliminated to facilitate subsequent cloning of mutant IRESes. To this end, an oligonucleotide cassette formed by the K7 $\Delta$ KpnI $\Delta$ BamHI(+) and K7 $\Delta$ KpnI $\Delta$ BamHI(-) primers was inserted in the HindIII and EcoRV restriction sites of pcDNA5FRT. The different mutants of HIV-1 IRES were made by PCR amplification with four primers. The external primers were Ext-KpnI(+) et Ext-BamHI(-). The details for all the primers used can be found in Supplementary Table 1. The resulting PCR products were cloned in the KpnI and BamHI restriction sites of pFRT-dual-IRES-HIV.

**Supplementary Table I:  
Names and Sequences of the Oligonucleotide Primers Used in this Study**

| <b>Primer Name</b>         | <b>Primer Sequence</b>                                                                        |
|----------------------------|-----------------------------------------------------------------------------------------------|
| <b>ΔAflIII-SpeI (+)</b>    | 5' GACCCGGGGTACCAAGCTTGAGTTTAAACGCTAGCCAGC' 3                                                 |
| <b>ΔAflIII-HindIII (-)</b> | 5' GCGTTGACATTGATTATTGACTAGTTATTAATAGTAATCAATTACGGG' 3                                        |
| <b>TAR-Kpn-uag (+)</b>     | 5' GCGTTTAAACTTAAGCTTGGTACCCTAGGGTCTCTCTGGTTAGACCAG' 3                                        |
| <b>TAR-Kpn (-)</b>         | 5' CGAGCTCGGTACCAAGCTTTATTGAGGC' 3                                                            |
| <b>5' UTR-AflIII (+)</b>   | 5' GGCTAACTAGGGAACCCACTGCTTAAGCCTCAATAAAGCTTGCC' 3                                            |
| <b>5' UTR-BamHI (-)</b>    | 5' AAAAAAGGATCCGCTTCCGCCTCCGCCGGTGGCTCTAGCGCTCCCCCGCTTAATACT<br>GACGCTCTCGCACCCATCTCTCTCCC' 3 |
| <b>Linker-BamHI (-)</b>    | 5' TTTTTTGGATCCTGCTTCCGCCTCCGCCGCTTCCGCCTCCGCCGGTGGCTCTAGCGCT<br>CCC' 3                       |
| <b>K7ΔKpnIΔBamHI (+)</b>   | 5' AGCTTGGTAGCGAGCTCGCATCCACTAGTCCAGTGTGGTGAATTCTGCAGAT' 3                                    |
| <b>K7ΔKpnIΔBamHI (-)</b>   | 5' ATCTGCAGAATTCACCACACTGGACTAGTGGATGCGAGCTCGCTACCA' 3                                        |
| <b>Ext-KpnI (+)</b>        | 5' GAGCTTCGTGGAGAGAGTGCTG' 3                                                                  |
| <b>Ext-BamHI (-)</b>       | 5' CGTCTTCTTGGATCCTGGTGTCTCCGCCTC' 3                                                          |
| <b>M1-Δloop202-217 (+)</b> | 5' GCCCGAACAGGGACTTCCAGAGGAGCTCTCTCGACGC' 3                                                   |
| <b>M1-Δloop202-217 (-)</b> | 5' GAGAGAGCTCCTCTGGAAGTCCCTGTTCCGGGCGCC' 3                                                    |
| <b>M2-ΔSL134-178 (+)</b>   | 5' GCCCGTCTGTTGTGTGACTCTGGTAACAGTGGCGCCCGAACAGGG' 3                                           |
| <b>M2-ΔSL134-178 (-)</b>   | 5' CCCTGTTCCGGGCGCCACTGTTACCAGAGTCACACAACAGACGGGC' 3                                          |
| <b>M3-stem134 (+)</b>      | 5' CCCTTTTAGTCAGTGTGGAAACCGGGATCCAGTGGCGCCCGAACAGGG' 3                                        |
| <b>M3-stem134 (-)</b>      | 5' CCCTGTTCCGGGCGCCACTGGATCCCGGTTTCCACACTGACTAAAAGGG' 3                                       |
| <b>M4-stem143 (+)</b>      | 5' GATCCCTCAGACCCTTTTAAGGAGACTTCAAATCTCTAGCAGTGGCGCCCG' 3                                     |
| <b>M4-stem143 (-)</b>      | 5' CCACTGCTAGAGATTTTCCACACTCCTTAAAAGGGTCTGAGGGATCTCTAGTTACC' 3                                |
| <b>M5-stem143bot (+)</b>   | 5' GATCCCTCAGACCCTTTTAGTCAGACTTCAAATCTCTAGCAGTGGCGCCCG' 3                                     |
| <b>M5-stem143bot (-)</b>   | 5' CCACTGCTAGAGATTTTGAAGTCTGACTAAAAGGGTCTGAGGGATCTCTAGTTACC' 3                                |
| <b>M6-stem143up (+)</b>    | 5' GATCCCTCAGACCCTTTTAAGGAGTGTGGAAAATCTCTAGCAGTGGCGCCCG' 3                                    |
| <b>M6-stem143up (-)</b>    | 5' CCACTGCTAGAGATTTTCCACACTCCTTAAAAGGGTCTGAGGGATCTCTAGTTACC' 3                                |
| <b>M7-Δloop151 (+)</b>     | 5' CTAGAGATCCCTCAGAAGTCAGTGTGGAAAATCTCTCTAGC' 3                                               |
| <b>M7-Δloop151 (-)</b>     | 5' GATTTTCCACACTGACTTCTGAGGGATCTCTAGTTACC' 3                                                  |
| <b>M8-loop151 (+)</b>      | 5' CTAGAGATCCCTCAGAGGGAAAAAGTCAGTGTGGAAAATCTCTAGC' 3                                          |
| <b>M8-loop151 (-)</b>      | 5' GATTTTCCACACTGACTTTTTCCCTCTGAGGGATCTCTAGTTACCAG' 3                                         |
| <b>M9-AAA-CCC (+)</b>      | 5' CCCTTTTAGTCAGTGTGGCCCATCTCTAGCAGTGGCGCC' 3                                                 |
| <b>M9-AAA-CCC (-)</b>      | 5' GGCGCCACTGCTAGAGATGGGCCACACTGACTAAAAGGG' 3                                                 |
| <b>M10-AAA-GGG (+)</b>     | 5' CCCTTTTAGTCAGTGTGGGGATCTCTAGCAGTGGCGCC' 3                                                  |

|                        |                                                        |
|------------------------|--------------------------------------------------------|
| <b>M10-AAA-GGG (-)</b> | 5' GCGCCACTGCTAGAGATCCCCCAGACTGACTAAAAGGG' 3           |
| <b>M11-AAA-UUU (+)</b> | 5' CCCTTTTAGTCAGTGTGGTTTATCTCTAGCAGTGGCGCC' 3          |
| <b>M11-AAA-UUU (-)</b> | 5' GCGCCACTGCTAGAGATAAACACACTGACTAAAAGGG' 3            |
| <b>M12-BMH (+)</b>     | 5' GAGCTCTCTCGACGCACCCCTCGGCTTGCTGAAGCGC' 3            |
| <b>M12-BMH (-)</b>     | 5' GCTTCAGCAAGCCGAGGGGTGCGTCGAGAGAGCTCCTC' 3           |
| <b>M13-BMH (+)</b>     | 5' GCACGGCAAGAGGCGAGTCCAGGCGACTGGTGAGTACG' 3           |
| <b>M13-BMH (-)</b>     | 5' CGTACTCACCAGTCGCCTGGACTCGCCTCTTGCCGTGC' 3           |
| <b>M14-BMH (+)</b>     | 5' GGGAGGCGACTGGTGAGTCGCCTAAAATTTTACTAGCGGAGGCTAG' 3   |
| <b>M14-BMH (-)</b>     | 5' CTAGCCTCCGCTAGTCAAAAATTTTAGGCGACTCACCAGTCGCCTCCC' 3 |
| <b>M15-LDI (+)</b>     | 5' CGAGGGGAGGCGACTGGTGCGCACCCAAAAATTTTACTAGC' 3        |
| <b>M15-LDI (-)</b>     | 5' GCTAGTCAAAAATTTTGGGTGCGCACCCAGTCGCCTCCCCTCG' 3      |
| <b>M16-LDI (+)</b>     | 5' CGACTGGTGAGTACGCCATCCTTTTTTACTAGCGGAGGC' 3          |
| <b>M16-LDI (-)</b>     | 5' GCCTCCGCTAGTCAAAAAGGATGGCGTACTCACCAGTCG' 3          |
| <b>M17-LDI (+)</b>     | 5' GGTGAGTACGCCAAAAATTTTTTCTAGCGGAGGCTAGAAGGAGAG' 3    |
| <b>M17-LDI (-)</b>     | 5' CTCTCCTTCTAGCCTCCGCTAGAAAAATTTTTTGGCGTACTCACC' 3    |

## **Supplementary Results**

**The 134-178 stem-loop, the 202-217 region and the four-nt bulge in the DIS hairpin, but not the A stretch in loop I, are highly conserved among natural variants of HIV-1 group M subtype B.**

The 5'UTR region of HIV-1 is the most conserved region in the HIV-1 genome (3). The HIV-1 5'UTR region used in this study originates from pLAI. We examined the conservation of the different regions which we found to influence the 5'UTR IRES activity among group M subtype B natural variants. These regions of pLAI were aligned with the corresponding regions of HIV-1 group M subtype B variants available in the HIV sequence database of the Los Alamos National Laboratory available at the following URL : <http://www.hiv.lanl.gov/>. When the 134-178 stem-loop (IRENE) from pLAI was aligned with the corresponding region of 97 available variants, we found that it is highly conserved (Supp. Fig. 1A). Most of the differences are located in the upper 7-pyrimidine loop, which did not influence the 5'UTR IRES activity. Twenty-one variants have mutations in the upper stem, but only five of these mutations disrupt a base-pair. The 3A bulge is conserved in all these variants except three. When nt 200-219 of pLAI were aligned with the corresponding region of 129 available variants (Supp. Fig. 1B), this unstructured region was also found to be highly conserved except for the four nt at the 3' end. When nt 236-246 of pLAI were aligned with the corresponding region of 142 available variants, we observed that the four-nt bulge at the beginning of the DIS hairpin (Supp. Fig. 1C) is highly conserved since only four variants differ from pLAI. Finally, nt 301-305 of pLAI, a stretch of five A in the beginning of loop I, were aligned with the corresponding region of 149 available variants (Supp. Fig. 1D). The five A are conserved in 60 variants. However, 62 variants have deletions and/or mutations in this region. Therefore, while the 301-305 segment shows some variability, IRENE, the 202-217 region and the 239-242 bulge are highly conserved.

## Supplementary Figure Legends

### Supplementary FIGURE 1

(A) Sequence alignment of the 134-178 stem-loop. These sequences originated from pLAI and the corresponding regions of HIV-1 group M subtype B variants retrieved from HIV-1 database from Los Alamos National Laboratory. Lines indicate identical bases, R represents A or G; Y represents C or U; B represents C, G or U; N represents any nt. When the region of interest of a variant is identical to pLAI, its name is in bold. (B) Sequence alignment of the unstructured 202-217 segment. (C) Sequence alignment of the four-nt bulge in the DIS hairpin (nt 239-242). (D) Sequence alignment of the beginning of loop I (nt 302-305). In (B), (C) and (D), the region of interest is in gray.

### Supplementary References

1. Dulude, D., Berchiche, Y.A., Gendron, K., Brakier-Gingras, L. and Heveker, N. (2006) Decreasing the frameshift efficiency translates into an equivalent reduction of the replication of the human immunodeficiency virus type 1. *Virology*, **345**, 127-136.
2. Gendron, K., Charbonneau, J., Dulude, D., Heveker, N., Ferbeyre, G. and Brakier-Gingras, L. (2008) The presence of the TAR RNA structure alters the programmed -1 ribosomal frameshift efficiency of the human immunodeficiency virus type 1 (HIV-1) by modifying the rate of translation initiation. *Nucleic Acids Res*, **36**, 30-40.
3. Berkhout, B. (1996) Structure and function of the human immunodeficiency virus leader RNA. *Prog Nucleic Acid Res Mol Biol*, **54**, 1-34.
4. Peden, K., Emerman, M. and Montagnier, L. (1991) Changes in growth properties on passage in tissue culture of viruses derived from infectious molecular clones of HIV-1LAI, HIV-1MAL, and HIV-1ELI. *Virology*, **185**, 661-672.

# A) The 134-178 stem-loop (IRENE)

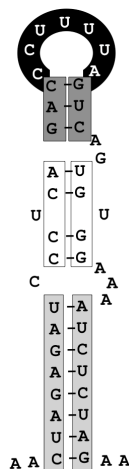

| pLAI                               | C        | U | CA | GAC | CCUUUUU | GUC | AG | UG | U | GG | AAA | A. UCUCUAG |
|------------------------------------|----------|---|----|-----|---------|-----|----|----|---|----|-----|------------|
| B. FR. 83.HXB2_LAI_IIIB_BRU.K03455 |          |   |    |     |         |     |    |    |   |    |     |            |
| B. AU. 86.MBC200.AF042100          |          |   |    |     |         |     |    |    |   |    |     |            |
| B. AU. 87.MBC925.AF042101          |          |   |    |     |         |     |    |    |   |    |     |            |
| B. AU.x.1181.AF538302              |          |   |    |     |         | U   | C  |    |   | A  |     |            |
| B. AU.x.C24.AF538304               |          |   |    |     |         |     |    |    |   |    | G   |            |
| B. AU.x.C42.AF538305               |          |   |    |     | AA      |     |    |    |   |    |     |            |
| B. AU.x.C76.AF538306               |          |   |    |     |         |     |    |    |   |    |     |            |
| B. AU.x.C92.AF538307               |          |   |    |     |         |     |    |    |   |    |     | G          |
| B. BR. 02.02BR011.DQ358809         |          |   |    |     | A       | A   |    |    |   |    |     |            |
| B. BR. 02.02BR013.DQ358810         | AC       |   |    |     | A       |     |    |    |   |    |     | A          |
| B. BR. 03.BREPM1023.EF637057       |          |   |    |     |         |     |    |    |   |    |     |            |
| B. BR. 03.BREPM1038.EF637048       |          |   |    |     | A       | C   |    |    |   |    |     |            |
| B. BR. 04.BREPM1066.FJ195090       |          |   |    |     | AAC     |     |    |    |   |    |     |            |
| B. BR. 04.BREPM1070.FJ195086       |          | U | U  |     | U       | A   | G  |    |   | U  | G   | U          |
| B. BR. 04.BREPM1070.FJ195086       |          |   |    |     | U       | A   | G  |    |   | U  | G   | U          |
| B. BR. 05.BREPM1081.FJ195091       |          |   |    |     | A       |     | C  |    |   |    |     |            |
| B. BR. 05.BREPM1093.FJ195089       |          |   |    |     | A       |     |    |    |   |    |     |            |
| B. CA. 96.WC10C_4.AY314056         |          |   |    |     | U       |     |    |    |   |    |     |            |
| B. CN. 02.02HNSc11.DQ007903        |          |   |    |     | A       | A   |    |    |   |    |     |            |
| B. CN. 05.05CNHB_hp3.DQ990880      |          |   |    |     | A       |     |    | U  | U |    |     |            |
| B. CU. 99.Cu19.AY586542            |          |   |    |     | U       | C   |    |    |   |    |     |            |
| B. CU. 99.Cu43.AY586543            |          |   |    |     | U       | C   |    |    |   |    |     |            |
| B. DE. 86.D31.U43096               |          |   |    |     |         |     |    |    |   |    |     |            |
| B. DE. 86.HAN.U43141               |          |   |    |     | U       |     |    |    |   |    |     |            |
| B. ES. 05.ES.EU786672              |          |   |    |     |         |     |    |    |   |    |     |            |
| B. ES. 06.ES.EU786676              |          |   |    |     |         |     |    |    |   |    |     |            |
| B. ES. 06.ES.EU786677              |          |   |    |     |         |     |    |    |   |    |     |            |
| B. ES. 07.ES.EU786678              |          |   |    |     | A       |     |    |    |   |    |     |            |
| B. ES. 07.ES.EU786679              |          |   |    |     | A       | AGC |    |    |   |    |     | U          |
| B. ES. 07.ES.EU786680              |          |   |    |     | AA      |     | C  |    |   |    |     |            |
| B. ES. 89.U61.DQ854716             | UAGAGAUC |   | U  |     | AA      |     |    |    |   | A  |     |            |
| B. GA. 88.OYI.M26727               |          |   |    |     |         |     |    |    |   |    |     |            |
| B. GB. 83.CAM1.D10112              |          |   |    |     |         |     |    |    |   |    |     |            |
| B. GB. 86.GB8.AJ271445             |          |   |    |     |         |     |    |    |   | A  |     |            |
| B. GB.x.MANC.U23487                |          |   |    |     |         |     |    |    |   |    |     |            |
| B. IU. 05.SG1.DQ672623             |          |   |    |     |         |     |    |    |   |    |     |            |
| B. JP. 00.DR2508.AB289588          |          |   |    |     | CUGG    |     |    |    |   | A  |     |            |
| B. JP. 01.DR388.AB289590           |          |   |    |     | A       | A   |    |    |   |    |     |            |
| B. JP. 04.04JPDR6075B.AB221125     |          |   |    |     |         |     |    |    |   |    |     |            |
| B. JP. 04.DR6089.AB286955          |          |   |    |     | A       | A   |    |    |   |    |     |            |
| B. JP. 05.DR6538.AB287363          |          |   |    |     |         |     | C  |    |   |    |     |            |
| B. JP. 05.DR6737.AB287364          |          |   |    |     | A       |     |    | C  |   |    |     |            |
| B. JP. 05.DR7060.AB287366          |          |   |    |     | AU      | G   |    |    |   |    |     |            |
| B. JP. 05.DR7065.AB287368          |          |   |    |     | U       | AUC |    | C  |   |    |     | A          |
| B. JP. 99.DR1348.AB287370          |          |   |    |     |         |     |    |    |   |    |     |            |
| B. KR. 04.04KMH5.DQ295193          |          |   |    |     | AA      |     |    |    |   |    |     |            |
| B. KR. 04.04LHS6.AY839827          |          |   |    |     | A       |     |    |    |   |    |     |            |
| B. KR. 04.04LSK7.DQ295192          |          |   |    |     |         |     |    |    |   |    |     |            |
| B. KR. 04.04WK7_HIV_1_wk.DQ295194  |          |   |    |     |         |     |    |    |   |    |     |            |
| B. KR. 05.05CSR3.DQ837381          |          |   |    |     | AA      |     |    |    |   |    |     |            |
| B. NL. 00.671_00U36.AY423387       |          |   |    |     |         |     |    |    |   |    |     |            |
| B. NL. 86_3202A21.U34604           |          |   |    |     |         |     |    |    |   | A  |     |            |
| B. NL. 96.H434_42_A1.AY970948      |          |   |    |     |         |     |    |    |   | A  |     |            |
| B. RU. 04.04RU128005.AY682547      |          |   |    |     |         |     |    |    |   |    | R   |            |
| B. RU. 04.04RU129005.AY751406      |          |   |    |     | A       |     |    |    |   |    |     |            |
| B. UW. 94.UWCYS.AF086817           |          |   |    |     | A       |     |    |    |   |    |     |            |
| B. US. 00.14294_1.DQ853436         |          |   |    |     | U       |     |    |    | U | C  |     | A          |
| B. US. 00.ES1_20.EF363123          |          |   |    |     |         |     |    |    |   |    |     |            |
| B. US. 04.ES10_53.EF363127         |          |   |    |     |         |     |    |    |   |    |     |            |
| B. US. 04.ES4_24.EF363124          |          |   |    |     |         |     |    |    |   |    |     |            |
| B. US. 04.ES8_43.EF363126          |          |   |    |     | A       |     |    |    |   |    |     |            |
| B. US. 83.5018_83.AY835777         |          |   |    |     |         |     |    |    |   |    |     |            |
| B. US. 83.5157_83.AY835781         |          |   |    |     |         |     |    |    |   |    |     |            |
| B. US. 83.RF.M17451                |          |   |    |     | UC      |     |    |    |   |    |     |            |
| B. US. 83.SF2.K02007               |          |   |    |     |         |     |    |    |   |    |     | A          |
| B. US. 84.5019_84.AY835779         |          |   |    |     |         |     |    |    |   |    |     |            |
| B. US. 84.MNCG.M17449              |          |   |    |     | U       |     |    |    |   | G  |     |            |
| B. US. 84.NY5CG.M38431             |          |   |    |     |         |     |    |    |   |    |     |            |
| B. US. 84.SF33.AY352275            |          |   |    |     |         |     |    |    |   |    |     |            |
| B. US. 85.5077_85.AY835769         |          |   |    |     |         |     |    |    |   |    |     |            |
| B. US. 85.Ba_L.AB221005            |          |   |    |     |         |     |    |    |   |    |     |            |
| B. US. 86.5084_86.AY835775         |          |   |    |     |         |     |    |    |   |    |     |            |
| B. US. 86.5096_86.AY835749         |          |   |    |     |         |     |    |    |   |    |     |            |
| B. US. 86.5127_86.AY835774         |          |   |    |     |         |     |    |    |   |    |     |            |
| B. US. 86.AD87.AF004394            |          |   |    |     |         |     |    |    |   |    |     |            |
| B. US. 86.YU_2.M93258              |          |   |    |     |         |     |    |    |   |    |     |            |
| B. US. 87.5113_87.AY835758         |          |   |    |     |         |     |    |    |   |    |     |            |
| B. US. 87.BC.L02317                |          |   |    |     | U       |     |    |    |   |    |     |            |
| B. US. 88.5160_88.AY835763         |          |   |    |     |         |     |    |    |   |    |     |            |
| B. US. 88.WR27.AF286365            |          |   |    |     |         |     |    |    |   |    |     |            |
| B. US. 89.P896.U39362              |          |   |    |     | A       | CC  |    |    | U |    |     | A          |
| B. US. 90.WCIPR.U69591             |          |   |    |     |         |     |    |    |   |    |     |            |
| B. US. 90.WEAU160.U21135           |          |   |    |     | A       |     |    |    |   |    |     |            |
| B. US. 91.5048_91.AY835761         |          |   |    |     |         |     |    |    |   |    |     |            |
| B. US. 91.DH12_3.AF069140          |          |   |    |     | A       |     |    |    |   |    |     |            |
| B. US. 93.WCD32P0793.DQ487188      |          |   |    |     | AAA     | A   |    |    |   |    |     |            |
| B. US. 93.WCM32P0793.DQ487190      |          |   |    |     | AA      |     |    |    |   |    |     |            |
| B. US. 94.5082_94.AY835773         |          |   |    |     |         |     |    |    |   |    |     |            |
| B. US. 95.5073_95.AY835768         |          |   |    |     |         |     |    |    |   |    |     |            |
| B. US. 96.5155_96.AY835753         |          |   |    |     |         |     |    |    |   |    |     |            |
| B. US. 97.ARES2.AB078005           |          |   |    |     | A       |     |    |    |   |    |     |            |
| B. US. 98.15384_1.DQ853463         |          |   |    |     |         |     |    |    | U | C  |     | A          |
| B. US. 98.98USHVTN1925c1.AY560107  |          |   |    |     |         |     |    |    |   |    |     |            |
| B. US. 98.98USHVTN3605c9.AY560108  |          |   |    |     |         |     |    |    |   |    |     |            |
| B. US. 98.98USHVTN8229c6.AY560109  |          |   |    |     | A       |     |    |    |   | A  |     | A          |
| B. US. 98.98USHVTN941c1.AY560110   |          |   |    |     | A       |     |    |    |   | A  |     | A          |
| B. US. 98.WC3_0498_4.EF175212      |          |   |    |     | U       |     |    |    |   |    |     | A          |
| B. ZA. 03.03ZAPS045MB2.DQ396398    |          |   |    |     | U       | AA  |    |    |   | A  | AA  | A          |

## B) The 202-217 segment

|                                         | pLAI      | UU     | GAAAG  | CGAAAG | GGAA    | AC   |
|-----------------------------------------|-----------|--------|--------|--------|---------|------|
| <b>B.FR.83.HXB2_LAI_IIIB_BRU.K03455</b> | <b>C-</b> | ----   | ----   | ----   | ----    | ---- |
| B.AU.86.MBC200.AF042100                 | --        | ----   | ----   | -A--   | ----    | ---- |
| B.AU.87.MBC925.AF042101                 | --        | -U--   | ----   | A----  | ----    | ---- |
| B.AU.95.MBCC54.AF042103                 | --        | ----   | ----   | A----  | ----    | ---- |
| <b>B.AU.96.MBCD36.AF042105</b>          | <b>--</b> | ----   | ----   | ----   | ----    | ---- |
| B.AU.x.1181.AF538302                    | --        | ----   | ----   | A----  | ----    | ---- |
| B.AU.x.C24.AF538304                     | --        | ----   | ----   | A----  | ----    | ---- |
| B.AU.x.C42.AF538305                     | <b>CG</b> | ----   | ----   | AA--   | ----    | ---- |
| B.AU.x.C76.AF538306                     | --        | ----   | ----   | A----  | ----    | ---- |
| B.AU.x.C92.AF538307                     | --        | ----   | ----   | A----  | ----    | ---- |
| B.BR.02.02BR008.DQ358808                | <b>CU</b> | ----   | U----  | UAG--  | ----    | ---- |
| B.BR.02.02BR011.DQ358809                | --        | ----   | ----   | UAG--  | ----    | ---- |
| B.BR.02.02BR013.DQ358810                | <b>UA</b> | ----   | ----   | UAG--  | C-      | ---- |
| B.BR.03.BREPM1023.EF637057              | <b>C-</b> | ----   | ----   | -AG--  | ----    | ---- |
| B.BR.03.BREPM1024.EF637056              | --        | ----   | ----   | UAG--  | ----    | ---- |
| B.BR.03.BREPM1027.EF637054              | --        | ----   | ----   | UA--   | ----    | ---- |
| B.BR.03.BREPM1033.EF637050              | <b>-C</b> | ----   | ----   | UAG--  | ----    | ---- |
| B.BR.03.BREPM1038.EF637048              | --        | ----   | ----   | UA-C   | G-      | ---- |
| B.BR.03.BREPM1040.EF637047              | <b>-A</b> | ----   | A----  | UAG--  | ----    | ---- |
| B.BR.03.BREPM2012.EF637046              | --        | ----   | ----   | UA--   | G-      | ---- |
| B.BR.04.BREPM1066.FJ195090              | <b>-C</b> | ----   | -A---- | UAG--  | ----    | ---- |
| B.BR.04.BREPM1070.FJ195086              | --        | ----   | -A---- | G----  | U AAG-- | ---- |
| B.BR.05.BREPM1081.FJ195091              | --        | ----   | -A---- | UA--   | ----    | ---- |
| B.BR.05.BREPM1084.FJ195088              | --        | ----   | -G---- | UAG--  | ----    | ---- |
| B.BR.05.BREPM1093.FJ195089              | <b>-C</b> | ----   | ----   | UAG--  | ----    | ---- |
| B.CA.96.WC10C.4.AY314056                | --        | ----   | ----   | A----  | ----    | ---- |
| B.CN.01.CNHN24.AY180905                 | <b>-A</b> | ----   | ----   | U--G   | ----    | ---- |
| B.CN.02.02HNsc11.DQ007903               | <b>C-</b> | ----   | ----   | U--G   | ----    | ---- |
| <b>B.CN.05.05CNHB_hp3.DQ990880</b>      | <b>CG</b> | ----   | ----   | U--G   | ----    | ---- |
| B.CN.x.RL42.U71182                      | --        | ----   | ----   | U--G   | ----    | ---- |
| B.CU.99.Cu43.AY586543                   | --        | ----   | U----  | UAG--  | ----    | ---- |
| B.DE.86.D31.U43096                      | --        | ----   | U----  | UA-G   | ----    | ---- |
| B.DE.86.HAN.U43141                      | --        | ----   | ----   | UAG--  | ----    | ---- |
| B.DK.01.CTL_016.EF514704                | <b>CG</b> | ----   | ----   | A----  | ----    | ---- |
| B.DK.01.CTL_017.EF514705                | --        | ----   | ----   | A----  | ----    | ---- |
| B.DK.01.CTL_018.EF514706                | --        | ----   | ----   | A----  | ----    | ---- |
| B.DK.01.CTL_030.EF514708                | <b>GC</b> | ----   | ----   | UAG--  | ----    | ---- |
| B.DK.01.CTL_033.EF514709                | <b>YU</b> | A----  | ----   | A----  | ----    | ---- |
| B.DK.04.PMVL_012.EF514699               | --        | ----   | ----   | A----  | ----    | ---- |
| B.DK.04.PMVL_013.EF514700               | --        | ----   | ----   | A----  | ----    | ---- |
| B.DK.04.PMVL_018.EF514697               | --        | ----   | ----   | A----  | ----    | ---- |
| B.DK.04.PMVL_025.EF514702               | --        | ----   | ----   | A----  | ----    | ---- |
| B.DK.04.PMVL_027.EF514698               | <b>CU</b> | ----   | ----   | A----  | ----    | ---- |
| B.DK.04.PMVL_039.EF514703               | --        | ----   | U----  | A----  | ----    | ---- |
| B.DK.04.PMVL_049.EF514701               | --        | ----   | ----   | UAG--  | ----    | ---- |
| B.ES.05.ES.EU786672                     | --        | ----   | -A---- | A----  | ----    | ---- |
| B.ES.06.ES.EU786675                     | <b>CC</b> | ----   | ----   | UAG--  | ----    | ---- |
| B.ES.06.ES.EU786676                     | --        | ----   | ----   | A----  | ----    | ---- |
| B.ES.06.ES.EU786677                     | <b>CC</b> | ----   | U----  | UUG--  | ----    | ---- |
| B.ES.07.ES.EU786678                     | <b>CG</b> | ----   | ----   | A----  | ----    | ---- |
| B.ES.07.ES.EU786679                     | --        | ----   | ----   | ----   | ----    | ---- |
| B.ES.07.ES.EU786680                     | <b>-C</b> | ----   | U----  | A--G   | ----    | ---- |
| B.ES.89.U61.DQ854716                    | --        | ----   | ----   | A----  | ----    | ---- |
| B.GA.88.OYI.M26727                      | <b>-C</b> | U----  | U----  | U--G   | ----    | ---- |
| B.GB.83.CAM1.D10112                     | ----      | -A---- | ----   | UAG--  | ----    | ---- |
| B.GB.86.GB8.AJ271445                    | --        | ----   | U----  | UUG--  | ----    | ---- |
| B.GB.x.MANC.U23487                      | <b>-C</b> | ----   | ----   | UAG--  | ----    | ---- |
| B.HK.x.HK003.FJ460500                   | <b>C-</b> | ----   | ----   | A--Δ   | ----    | ---- |
| B.HK.x.HK004.FJ460501                   | <b>-C</b> | ----   | ----   | A----  | ----    | ---- |
| B.IT.05.SGI.DQ672623                    | <b>-C</b> | ----   | ----   | A----  | ----    | ---- |
| B.JP.00.DR2508.AB289588                 | <b>-C</b> | ----   | ----   | UAG--  | ----    | ---- |
| B.JP.01.DR388.AB289590                  | --        | ----   | ----   | UAG--  | ----    | ---- |
| <b>B.JP.04.04JPDR6075B.AB221125</b>     | <b>GC</b> | ----   | ----   | UAG--  | ----    | ---- |
| B.JP.04.DR6089.AB286955                 | --        | ----   | ----   | A----  | ----    | ---- |

|                                        |            |              |              |        |      |      |
|----------------------------------------|------------|--------------|--------------|--------|------|------|
| B.JP.05.DR6538.AB287363                | --         | ----         | U----        | UAG--  | ---- | ---- |
| B.JP.05.DR6737.AB287364                | <b>-C-</b> | ----         | -A----       | C--G   | ---- | ---- |
| B.JP.05.DR7060.AB287366                | --         | ----         | A----        | UAG--  | ---- | ---- |
| B.JP.05.DR7065.AB287368                | <b>-C-</b> | <b>UG--A</b> | <b>G</b>     | U--G   | ---- | ---- |
| B.JP.99.DR1348.AB287370                | --         | ----         | ----         | UA--G  | ---- | ---- |
| B.KR.04.04KMH5.DQ295193                | --         | ----         | ----         | UAG--  | ---- | ---- |
| B.KR.04.04LHS6.AY839827                | --         | ----         | ----         | U--GU  | ---- | ---- |
| B.KR.04.04LSK7.DQ295192                | --         | ----         | ----         | UAG--  | ---- | ---- |
| <b>B.KR.04.04WK7_HIV_1_wk.DQ295194</b> | <b>--</b>  | ----         | -A----       | UAG--  | ---- | ---- |
| B.KR.05.05CSR3.DQ837381                | --         | ----         | ----         | -A---- | ---- | ---- |
| B.MM.99.msSTD101.AB097870              | <b>GC</b>  | ----         | ----         | UA--G  | ---- | ---- |
| B.NL.00.671_00T36.AY423387             | --         | ----         | -G--         | ΔΔΔ    | ---- | ---- |
| B.NL.86.3202A21.U34604                 | <b>GC</b>  | ----         | ----         | A----  | ---- | ---- |
| B.NL.96.H434_42_A1.AY970948            | <b>GC</b>  | ----         | ----         | UAG--  | ---- | ---- |
| B.RU.04.04RU128005.AY682547            | <b>YY</b>  | ----         | ----         | A----  | ---- | ---- |
| B.RU.04.04RU129005.AY751406            | --         | ----         | U----        | ----   | ---- | ---- |
| B.RU.04.04RU139089.AY751407            | --         | ----         | ----         | UAG--  | ---- | ---- |
| B.RU.04.04RU139095.AY819715            | --         | ----         | ----         | UAG--  | ---- | ---- |
| B.TW.94.TWCYS.AF086817                 | <b>-C-</b> | ----         | -A----       | A----  | ---- | ---- |
| B.US.00.14294_1.DQ853436               | <b>GC</b>  | ----         | ----         | UAG--  | ---- | ---- |
| B.US.00.ES1_20.EF363123                | --         | ----         | ----         | A----  | ---- | ---- |
| B.US.04.ES10_53.EF363127               | <b>AC</b>  | ----         | ----         | A----  | ---- | ---- |
| <b>B.US.04.ES4_24.EF363124</b>         | <b>--</b>  | ----         | ----         | ----   | ---- | ---- |
| B.US.04.ES8_43.EF363126                | <b>CG</b>  | ----         | ----         | A----  | ---- | ---- |
| B.US.83.5018_83.AY835777               | --         | ----         | ----         | UA--   | G-   | ---- |
| B.US.83.5157_83.AY835781               | --         | ----         | ----         | UA--   | G-   | ---- |
| B.US.83.RF.M17451                      | <b>CA</b>  | ----         | ----         | UAG--  | ---- | ---- |
| B.US.83.SF2.K02007                     | <b>GC</b>  | ----         | ----         | UAG--  | ---- | ---- |
| B.US.84.5019_84.AY835779               | --         | ----         | ----         | UA--   | G-   | ---- |
| B.US.84.MNCG.M17449                    | --         | ----         | ----         | AA---- | ---- | ---- |
| B.US.84.NY5CG.M38431                   | --         | ----         | -G--         | UA--   | G-   | ---- |
| B.US.84.SF33.AY352275                  | --         | ----         | U----        | UUΔ    | ---- | ---- |
| B.US.85.5077_85.AY835769               | --         | ----         | ----         | UA--   | G-   | ---- |
| B.US.85.Ba_L.AB221005                  | --         | ----         | ----         | A----  | ---- | ---- |
| B.US.86.5084_86.AY835775               | --         | ----         | ----         | UA--   | G-   | ---- |
| <b>B.US.86.5096_86.AY835749</b>        | <b>--</b>  | ----         | ----         | ----   | ---- | ---- |
| B.US.86.5127_86.AY835774               | --         | ----         | ----         | UA--   | G-   | ---- |
| B.US.86.AD87.AF004394                  | --         | ----         | U----        | UAG--  | ---- | ---- |
| B.US.86.YU_2.M93258                    | --         | ----         | ----         | -A---- | ---- | ---- |
| B.US.87.5113_87.AY835758               | --         | ----         | ----         | UA--   | G-   | ---- |
| B.US.87.BC.L02317                      | <b>CG</b>  | ----         | ----         | A----  | ---- | ---- |
| B.US.88.5160_88.AY835763               | --         | ----         | ----         | UA--   | G-   | ---- |
| B.US.88.WR27.AF286365                  | <b>-C-</b> | <b>A----</b> | ----         | UAG--  | ---- | ---- |
| B.US.89.F896.U39362                    | <b>CG</b>  | ----         | ----         | A----  | ---- | ---- |
| B.US.90.US1.AY173952                   | <b>-C-</b> | ----         | ----         | A----  | ---- | ---- |
| <b>B.US.90.US2.AY173953</b>            | <b>--</b>  | ----         | ----         | ----   | ---- | ---- |
| B.US.90.US3.AY173954                   | <b>-A</b>  | ----         | ----         | UA--   | ---- | ---- |
| B.US.90.US4.AY173955                   | <b>CC</b>  | ----         | ----         | UAG--  | ---- | ---- |
| <b>B.US.90.WCIPR.U69591</b>            | <b>--</b>  | ----         | ----         | ----   | ---- | ---- |
| <b>B.US.90.WEAU160.U21135</b>          | <b>CC</b>  | ----         | ----         | ----   | ---- | ---- |
| B.US.91.5048_91.AY835761               | --         | ----         | ----         | UA--   | G-   | ---- |
| B.US.91.DH12_3.AF069140                | <b>CG</b>  | ----         | ----         | A----  | ---- | ---- |
| B.US.93.WCD32P0793.DQ487188            | <b>-C-</b> | ----         | U----        | A----  | ---- | ---- |
| B.US.93.WCM32P0793.DQ487190            | --         | ----         | ----         | -A---- | ---- | ---- |
| B.US.94.5082_94.AY835773               | --         | ----         | ----         | UA--   | G-   | ---- |
| B.US.95.5073_95.AY835768               | --         | ----         | ----         | UA--   | G-   | ---- |
| B.US.96.5155_96.AY835753               | --         | ----         | ----         | UA--   | G-   | ---- |
| B.US.97.ARES2.AB078005                 | --         | ----         | ----         | A----  | ---- | ---- |
| B.US.98.15384_1.DQ853463               | <b>GC</b>  | ----         | ----         | UA--   | ---- | ---- |
| B.US.98.98USHVTN1925c1.AY560107        | <b>-C-</b> | ----         | ----         | A----  | ---- | ---- |
| B.US.98.98USHVTN3605c9.AY560108        | --         | ----         | ----         | A----  | ---- | ---- |
| B.US.98.98USHVTN8229c6.AY560109        | <b>AA</b>  | <b>-UG-G</b> | <b>A-U-G</b> | U--Δ   | ---- | ---- |
| B.US.98.98USHVTN941c1.AY560110         | <b>CA</b>  | ----         | ----         | UAG--  | ---- | ---- |
| B.US.98.WC3_0498_4.EF175212            | <b>-C</b>  | ----         | ----         | UAG--  | ---- | ---- |
| B.ZA.03.03ZAPS045MB2.DQ396398          | <b>-C-</b> | ----         | ----         | A----  | ---- | ---- |

## C) The 4-nt 239-242 bulge

|                                   | pLAI | C | GC         | AGGA | ..      | CUCG |
|-----------------------------------|------|---|------------|------|---------|------|
| B.FR.83.HXB2_LAI_IIIIB_BRU.K03455 | -    | - | ----       | ..   | ----    | ..   |
| B.AU.86.MBC200.AF042100           | -    | - | ----       | ..   | ----    | ..   |
| B.AU.87.MBC925.AF042101           | -    | - | ----       | ..   | ----    | ..   |
| B.AU.95.MBCC54.AF042103           | -    | - | ----       | ..   | ----    | ..   |
| B.AU.96.MBCC98.AF042104           | -    | - | ----       | ..   | ----    | ..   |
| B.AU.96.MBCD36.AF042105           | -    | - | ----       | ..   | ----    | ..   |
| B.AU.x.1181.AF538302              | -    | - | ----       | ..   | ----    | ..   |
| B.AU.x.2870718.AY857022           | -    | - | ----       | ..   | ----    | ..   |
| B.AU.x.C24.AF538304               | -    | - | ----       | ..   | ----    | ..   |
| B.AU.x.C42.AF538305               | -    | - | -----A---- | ..   | ----    | ..   |
| B.AU.x.C76.AF538306               | -    | - | ----       | ..   | -----U  | ..   |
| B.AU.x.C92.AF538307               | -    | - | ----       | ..   | ----    | ..   |
| B.AU.x.VH.AF146728                | -    | - | ----       | ..   | ----    | ..   |
| B.BR.02.02BR008.DQ358808          | -    | - | ----       | ..   | ----    | ..   |
| B.BR.02.02BR011.DQ358809          | -    | - | ----       | ..   | ----    | ..   |
| B.BR.02.02BR013.DQ358810          | A    | C | ----       | ..   | ----    | ..   |
| B.BR.03.BREPM1023.EF637057        | -    | - | ----       | ..   | ----    | ..   |
| B.BR.03.BREPM1024.EF637056        | -    | - | ----       | ..   | ----    | ..   |
| B.BR.03.BREPM1027.EF637054        | -    | - | ----       | ..   | ----    | ..   |
| B.BR.03.BREPM1028.EF637053        | -    | - | ----       | ..   | ----    | ..   |
| B.BR.03.BREPM1032.EF637051        | -    | - | ----       | ..   | ----    | ..   |
| B.BR.03.BREPM1033.EF637050        | -    | - | ----       | ..   | ----    | ..   |
| B.BR.03.BREPM1035.EF637049        | -    | - | ----       | ..   | ----    | ..   |
| B.BR.03.BREPM1038.EF637048        | -    | - | ----       | ..   | ----    | ..   |
| B.BR.03.BREPM1040.EF637047        | -    | - | ----       | ..   | ----    | ..   |
| B.BR.03.BREPM2012.EF637046        | -    | - | ----       | ..   | ----    | ..   |
| B.BR.04.BREPM1066.FJ195090        | -    | - | ----       | ..   | ----    | ..   |
| B.BR.04.BREPM1070.FJ195086        | -    | - | -----C-    | ..   | -----G- | ..   |
| B.BR.05.BREPM1081.FJ195091        | -    | - | ----       | ..   | ----    | ..   |
| B.BR.05.BREPM1084.FJ195088        | -    | - | ----       | ..   | ----    | ..   |
| B.BR.05.BREPM1093.FJ195089        | -    | - | ----       | ..   | ----    | ..   |
| B.CA.96.WC10C_4.AY314056          | -    | - | ----       | ..   | ----    | ..   |
| B.CN.01.CNHN24.AY180905           | -    | - | ----       | ..   | ----    | ..   |
| B.CN.02.02HNsc11.DQ007903         | -    | - | ----       | ..   | ----    | ..   |
| B.CN.05.05CNHB_hp3.DQ990880       | -    | - | ----       | ..   | ----    | ..   |
| B.CN.x.RL42.U71182                | -    | - | ----       | ..   | ----    | ..   |
| B.CU.99.Cu19.AY586542             | -    | - | ----       | ..   | ----    | ..   |
| B.CU.99.Cu43.AY586543             | -    | - | ----       | ..   | ----    | ..   |
| B.DE.86.D31.U43096                | -    | - | ----       | ..   | ----    | ..   |
| B.DE.86.HAN.U43141                | -    | - | ----       | ..   | ----    | ..   |
| B.DK.01.CTL_016.EF514704          | -    | - | ----       | ..   | ----    | ..   |
| B.DK.01.CTL_017.EF514705          | -    | - | ----       | ..   | ----    | ..   |
| B.DK.01.CTL_018.EF514706          | -    | - | ----       | ..   | ----    | ..   |
| B.DK.01.CTL_023.EF514707          | -    | - | ----       | ..   | ----    | ..   |
| B.DK.01.CTL_030.EF514708          | -    | - | ----       | ..   | ----    | ..   |
| B.DK.01.CTL_033.EF514709          | -    | - | ----       | ..   | ----    | ..   |
| B.DK.01.CTL_035.EF514710          | -    | - | ----       | ..   | ----    | ..   |
| B.DK.01.CTL_043.EF514712          | -    | - | ----       | ..   | ----    | ..   |
| B.DK.04.PMVL_012.EF514699         | -    | - | ----       | ..   | ----    | ..   |
| B.DK.04.PMVL_013.EF514700         | -    | - | ----       | ..   | ----    | ..   |
| B.DK.04.PMVL_018.EF514697         | -    | - | ----       | ..   | ----    | ..   |
| B.DK.04.PMVL_025.EF514702         | -    | - | ----       | ..   | ----    | ..   |
| B.DK.04.PMVL_027.EF514698         | -    | - | ----       | ..   | ----    | ..   |
| B.DK.04.PMVL_039.EF514703         | -    | - | -----G     | GBAU | GG      | GGG- |
| B.DK.04.PMVL_049.EF514701         | -    | - | ----       | ..   | ----    | ..   |
| B.ES.05.ES.EU786672               | -    | - | ----       | ..   | ----    | ..   |
| B.ES.06.ES.EU786675               | -    | - | ----       | ..   | ----    | ..   |
| B.ES.06.ES.EU786676               | -    | - | ----       | ..   | ----    | ..   |
| B.ES.06.ES.EU786677               | -    | - | ----       | ..   | ----    | ..   |
| B.ES.07.ES.EU786678               | -    | - | ----       | ..   | ----    | ..   |
| B.ES.07.ES.EU786679               | -    | - | ----       | ..   | ----    | ..   |
| B.ES.07.ES.EU786680               | -    | - | ----       | ..   | ----    | ..   |
| B.ES.89.U61.DQ854716              | -    | - | ----       | ..   | ----    | ..   |
| B.GA.88.OYI.M26727                | -    | - | ----       | ..   | ----    | ..   |
| B.GB.83.CAM1.D10112               | -    | - | ----       | ..   | ----    | ..   |
| B.GB.86.GB8.AJ271445              | -    | - | -----A-G   | A    | ----    | ..   |
| B.GB.x.MANC.U23487                | -    | - | ----       | ..   | ----    | ..   |
| B.HK.x.HK003.FJ460500             | -    | - | ----       | ..   | ----    | ..   |
| B.HK.x.HK004.FJ460501             | -    | - | ----       | ..   | ----    | ..   |
| B.IN.x.11807.EF694037             | -    | - | ----       | ..   | ----    | ..   |
| B.IT.05.SG1.DQ672623              | -    | - | ----       | ..   | ----    | ..   |
| B.JP.00.DR2508.AB289588           | -    | - | ----       | ..   | ----    | ..   |
| B.JP.01.DR388.AB289590            | -    | - | ----       | ..   | ----    | ..   |
| B.JP.04.04JPDR6075B.AB221125      | -    | - | ----       | ..   | ----    | ..   |

|                                 |   |   |          |    |      |    |
|---------------------------------|---|---|----------|----|------|----|
| B.JP.04.DR6089.AB286955         | - | - | ----     | .. | ---- | .. |
| B.JP.05.DR6538.AB287363         | - | - | ----     | .. | ---- | .. |
| B.JP.05.DR6737.AB287364         | - | - | ----     | .. | ---- | .. |
| B.JP.05.DR7060.AB287366         | - | - | ----     | .. | ---- | .. |
| B.JP.05.DR7065.AB287368         | - | - | ----     | .. | ---- | .. |
| B.JP.99.DR1348.AB287370         | - | - | ----     | .. | ---- | .. |
| B.KR.04.04KMH5.DQ295193         | - | - | ----     | .. | ---- | .. |
| B.KR.04.04LHS6.AY839827         | - | - | ----     | .. | ---- | .. |
| B.KR.04.04LSK7.DQ295192         | - | - | ----     | .. | ---- | .. |
| B.KR.04.04WK7_HIV_1_wk.DQ295194 | - | - | ----     | .. | ---- | .. |
| B.KR.05.05CSR3.DQ837381         | - | - | ----     | .. | ---- | .. |
| B.MM.99.mSTD101.AB097870        | - | - | ----     | .. | ---- | .. |
| B.NL.00.671_00T36.AY423387      | - | - | ----     | .. | ---- | .. |
| B.NL.86.3202A21.U34604          | - | - | ----     | .. | ---- | .. |
| B.NL.96.H434_42_A1.AY970948     | - | - | ----     | .. | ---- | .. |
| B.RU.04.04RU128005.AY682547     | - | - | ----     | .. | ---- | .. |
| B.RU.04.04RU129005.AY751406     | - | - | ----     | .. | ---- | .. |
| B.RU.04.04RU139089.AY751407     | - | - | ----     | .. | ---- | .. |
| B.RU.04.04RU139095.AY819715     | - | - | ----     | .. | ---- | .. |
| B.TH.90.BK132.AY173951          | - | - | ----     | .. | ---- | .. |
| B.TW.94.TWCYS.AF086817          | - | - | ----     | .. | ---- | .. |
| B.US.00.14294_1.DQ853436        | - | - | ----     | .. | ---- | .. |
| B.US.00.ES1_20.EF363123         | - | - | ----     | .. | ---- | .. |
| B.US.04.ES10_53.EF363127        | - | - | ----     | .. | ---- | .. |
| B.US.04.ES4_24.EF363124         | - | - | ----     | .. | ---- | .. |
| B.US.04.ES8_43.EF363126         | - | - | ----     | .. | ---- | .. |
| B.US.83.5018_83.AY835777        | - | - | ----     | .. | ---- | .. |
| B.US.83.5157_83.AY835781        | - | - | ----     | .. | ---- | .. |
| B.US.83.RF.M17451               | - | - | ----     | .. | ---- | .. |
| B.US.83.SF2.K02007              | - | - | ----     | .. | ---- | .. |
| B.US.84.5019_84.AY835779        | - | - | ----     | .. | ---- | .. |
| B.US.84.MNCG.M17449             | - | - | ----     | .. | ---- | .. |
| B.US.84.NY5CG.M38431            | - | - | ----     | .. | ---- | .. |
| B.US.84.SF33.AY352275           | - | - | ----     | .. | ---- | .. |
| B.US.85.5077_85.AY835769        | - | - | ----     | .. | ---- | .. |
| B.US.85.Ba_L.AB221005           | - | - | ----     | .. | ---- | .. |
| B.US.86.5084_86.AY835775        | - | - | ----     | .. | ---- | .. |
| B.US.86.5096_86.AY835749        | - | - | ----     | .. | ---- | .. |
| B.US.86.5127_86.AY835774        | - | - | ----     | .. | ---- | .. |
| B.US.86.AD87.AF004394           | - | - | ----     | .. | ---- | .. |
| B.US.86.JRFL.U63632             | - | - | ----     | .. | ---- | .. |
| B.US.86.YU_2.M93258             | - | - | ----     | .. | ---- | .. |
| B.US.87.5113_87.AY835758        | - | - | ----     | .. | ---- | .. |
| B.US.87.BC.L02317               | - | - | ----     | .. | ---- | .. |
| B.US.88.5160_88.AY835763        | - | - | ----     | .. | ---- | .. |
| B.US.88.WR27.AF286365           | - | - | ----     | .. | ---- | .. |
| B.US.89.P896.U39362             | - | - | ----     | .. | ---- | .. |
| B.US.90.US1.AY173952            | - | - | ----     | .. | ---- | .. |
| B.US.90.US2.AY173953            | - | - | ----     | .. | ---- | .. |
| B.US.90.US3.AY173954            | - | - | ----     | .. | ---- | .. |
| B.US.90.US4.AY173955            | - | - | ----     | .. | ---- | .. |
| B.US.90.WCIPR.U69591            | - | - | ----     | .. | ---- | .. |
| B.US.90.WEAU160.U21135          | - | - | ----     | .. | ---- | .. |
| B.US.91.5048_91.AY835761        | - | - | ----     | .. | ---- | .. |
| B.US.91.DH12_3.AF069140         | - | - | ----     | .. | ---- | .. |
| B.US.93.WCD32P0793.DQ487188     | - | - | ----     | .. | ---- | .. |
| B.US.93.WCM32P0793.DQ487190     | - | - | ----     | .. | ---- | .. |
| B.US.94.5082_94.AY835773        | - | - | ----     | .. | ---- | .. |
| B.US.95.5073_95.AY835768        | - | - | ----     | .. | ---- | .. |
| B.US.96.5155_96.AY835753        | - | - | ----     | .. | ---- | .. |
| B.US.97.ARES2.AB078005          | - | - | ----     | .. | ---- | .. |
| B.US.98.15384_1.DQ853463        | - | - | ----     | .. | ---- | .. |
| B.US.98.98USHVTN1925c1.AY560107 | - | - | ----     | .. | ---- | .. |
| B.US.98.98USHVTN3605c9.AY560108 | - | - | ----     | .. | ---- | .. |
| B.US.98.98USHVTN8229c6.AY560109 | - | - | -----A-G | A  | ---- | .. |
| B.US.98.98USHVTN941c1.AY560110  | - | - | ----     | .. | ---- | .. |
| B.US.98.WC3_0498_4.EF175212     | - | - | ----     | .. | ---- | .. |
| B.ZA.03.03ZAPS045MB2.DQ396398   | - | - | ----     | .. | ---- | .. |



## D) The stretch of A in loop I (nt 301-305)

| Accession              | PLAI         | AAAAA  | .....   | .....   | UUUUGA  |
|------------------------|--------------|--------|---------|---------|---------|
| B.FR.83.HXB2           | LAI          | IIIB   | BRU     | K03455  | -----   |
| B.AU.86.MBC200         | AF042100     | -----  | A.....  | .....U  | -----   |
| B.AU.87.MBC925         | AF042101     | -----  | A.....  | .....   | -----   |
| B.AU.95.MBCC54         | AF042103     | -----  | .....   | .....U  | -----   |
| B.AU.96.MBCC98         | AF042104     | -----  | .....   | .....   | -----   |
| B.AU.96.MBCD36         | AF042105     | -----  | .....   | .....   | -----   |
| B.AU.x.1181            | AF538302     | -----  | .....   | .....UU | -----   |
| B.AU.x.2870718         | AY857022     | G----- | .....   | .....   | -----   |
| B.AU.x.8634991         | AY857144     | -----  | AUAAA   | ....AA  | -----   |
| B.AU.x.9125091         | AY857165     | -----  | .....   | .....U  | -----   |
| B.AU.x.C24             | AF538304     | -----  | .....   | .....UA | -----   |
| B.AU.x.C42             | AF538305     | -----  | .....   | .....   | -----   |
| B.AU.x.C76             | AF538306     | -----  | .....   | .....   | -----   |
| B.AU.x.C92             | AF538307     | -----  | .....   | .....   | -----   |
| B.AU.x.VH              | AF146728     | -----  | .....   | .....   | -----   |
| B.BR.02.02BR008        | DQ358808     | -ΔΔΔΔ  | .....   | .....UU | -----   |
| B.BR.02.02BR011        | DQ358809     | -----  | C-UAAAA | .....   | -----   |
| B.BR.02.02BR013        | DQ358810     | -----  | UAAAA   | .....   | -----   |
| B.BR.03.BREPM1023      | EF637057     | -----  | .....   | .....U  | -----   |
| B.BR.03.BREPM1024      | EF637056     | -----  | .....   | .....   | -----   |
| B.BR.03.BREPM1027      | EF637054     | -ΔΔΔ   | .....   | .....   | -----   |
| B.BR.03.BREPM1028      | EF637053     | -----  | .....   | .....   | -----   |
| B.BR.03.BREPM1032      | EF637051     | -----  | A.....  | .....U  | -----   |
| B.BR.03.BREPM1033      | EF637050     | -ΔΔΔΔ  | .....   | .....UU | -----   |
| B.BR.03.BREPM1035      | EF637049     | -ΔΔΔ   | .....   | UUUUU   | -----   |
| B.BR.03.BREPM1038      | EF637048     | -----  | .....   | .....U  | -----   |
| B.BR.03.BREPM1040      | EF637047     | -ΔΔΔ   | .....   | .....U  | -----   |
| B.BR.03.BREPM2012      | EF637046     | -----  | A.....  | .....   | -----   |
| B.BR.04.BREPM1066      | FJ195090     | -----  | .....   | .....   | -----   |
| B.BR.04.BREPM1070      | FJ195086     | -----  | .....   | .....   | -----   |
| B.BR.05.BREPM1081      | FJ195091     | -----  | AUUAA   | ....AAA | -----   |
| B.BR.05.BREPM1084      | FJ195088     | -----  | UAAAA   | ....UU  | -----   |
| B.BR.05.BREPM1093      | FJ195089     | -----  | .....   | .....U  | -----   |
| B.BR.89.BZ167          | AY173956     | -----  | .....   | .....U  | -----   |
| B.CA.96.WC10C          | 4.AY314056   | -ΔΔ    | .....   | .....U  | -----   |
| B.CA.97.CANB3FULL      | AY779553     | -----  | .....   | .....   | -----   |
| B.CA.x.HDM003V01       | DQ322227     | -----  | .....   | .....C  | -----   |
| B.CN.01.CNHN24         | AY180905     | -----  | .....   | .....UU | -----   |
| B.CN.02.02HNsc11       | DQ007903     | -----  | A.....  | .....UU | -G----- |
| B.CN.05.05CNHB         | hp3.DQ990880 | -ΔΔΔΔ  | .....   | .....UU | -----   |
| B.CN.x.RL42            | U71182       | -ΔΔΔ   | .....   | .....   | Δ-----  |
| B.CU.99.Cu19           | AY586542     | -----  | .....   | .....U  | -----   |
| B.CU.99.Cu43           | AY586543     | -----  | .....   | .....U  | -----   |
| B.DE.86.D31            | U43096       | -----  | .....   | .....   | -----   |
| B.DE.86.HAN            | U43141       | -----  | .....   | .....   | -----   |
| B.DK.01.CTL_016        | EF514704     | G-Δ    | .....   | .....UU | -G----- |
| B.DK.01.CTL_017        | EF514705     | G-U-Δ  | .....   | .....   | -----   |
| B.DK.01.CTL_018        | EF514706     | -ΔΔΔ   | .....   | .....   | -----   |
| B.DK.01.CTL_023        | EF514707     | -----  | .....   | .....   | -----   |
| B.DK.01.CTL_030        | EF514708     | -----  | .....   | .....   | -----   |
| B.DK.01.CTL_033        | EF514709     | -G-Δ   | .....   | .....U  | -----   |
| B.DK.01.CTL_035        | EF514710     | -ΔΔΔ   | .....   | .....U  | -----   |
| B.DK.01.CTL_041        | EF514711     | -ΔΔ    | .....   | .....U  | -----   |
| B.DK.01.CTL_043        | EF514712     | -----  | .....   | .....U  | -----   |
| B.DK.04.PMVL_012       | EF514699     | -U--   | .....   | .....   | -----   |
| B.DK.04.PMVL_013       | EF514700     | -ΔΔ    | .....   | .....   | C-----  |
| B.DK.04.PMVL_018       | EF514697     | -----  | .....   | .....U  | -----   |
| B.DK.04.PMVL_025       | EF514702     | -U--   | .....   | .....   | -----   |
| B.DK.04.PMVL_027       | EF514698     | C----- | A.....  | .....U  | -----   |
| B.DK.04.PMVL_039       | EF514703     | -----  | .....   | .....UU | -----   |
| B.DK.04.PMVL_049       | EF514701     | -----  | .....   | .....U  | -----   |
| B.ES.05.ES             | EU786672     | -----  | .....   | .....   | -----   |
| B.ES.06.ES             | EU786674     | -ΔΔ    | .....   | .....UU | -----   |
| B.ES.06.ES             | EU786675     | -U--   | .....   | .....   | -----   |
| B.ES.06.ES             | EU786676     | -ΔΔΔ   | .....   | .....   | -----   |
| B.ES.06.ES             | EU786677     | -----  | .....   | .....   | -----   |
| B.ES.07.ES             | EU786678     | G----  | .....   | .....   | -----   |
| B.ES.07.ES             | EU786679     | -----  | A.....  | .....UU | -----   |
| B.ES.07.ES             | EU786680     | G----  | .....   | .....U  | -----   |
| B.ES.89.U61            | DQ854716     | -----  | .....   | .....   | -----   |
| B.GA.88.OYT            | M26727       | -----  | .....   | .....U  | -----   |
| B.GB.83.CAM1           | D10112       | -ΔΔΔΔ  | .....   | UUUA    | -----   |
| B.GB.86.GB8            | AJ271445     | -----  | .....   | .....   | -----   |
| B.GB.x.MANC            | U23487       | -----  | .....   | .....   | -----   |
| B.HK.x.HK003           | FJ460500     | -----  | .....   | .....U  | -----   |
| B.HK.x.HK004           | FJ460501     | -----  | .....   | .....U  | -----   |
| B.IN.x.11807           | EF694037     | -----  | .....   | .....   | -----   |
| B.IT.05.SG1            | DQ672623     | -ΔΔ    | .....   | .....UU | -----   |
| B.JP.00.DR2508         | AB289588     | -ΔΔΔ   | .....   | .....U  | -----   |
| B.JP.01.DR388          | AB289590     | -ΔΔ    | .....   | .....C  | -----   |
| B.JP.04.04JPDR6075B    | AB221125     | -ΔΔΔ   | .....   | .....U  | -----   |
| B.JP.04.DR6089         | AB286955     | G--Δ   | .....   | .....U  | -----   |
| B.JP.05.DR6538         | AB287363     | -----  | A.....  | .....UU | -----   |
| B.JP.05.DR6737         | AB287364     | -ΔΔ    | .....   | .....UU | -----   |
| B.JP.05.DR7060         | AB287366     | -----  | UAAAA   | .....U  | -----   |
| B.JP.05.DR7065         | AB287368     | -ΔΔΔ   | .....   | .....UU | -----   |
| B.JP.99.DR1348         | AB287370     | -----  | .....   | .....C  | -----   |
| B.KR.04.04KMH5         | DQ295193     | -----  | .....   | .....U  | -----   |
| B.KR.04.04LHS6         | AY839827     | -ΔΔΔΔ  | .....   | UUUU    | G-----  |
| B.KR.04.04LSK7         | DQ295192     | G--ΔΔ  | .....   | .....UU | -----   |
| B.KR.04.04WK7_HIV_1    | wk.DQ295194  | -----  | .....   | .....UU | -----   |
| B.KR.05.05CSR3         | DQ837381     | -----  | .....   | .....U  | -----   |
| B.MM.99.mSTD101        | AB097870     | -----  | .....   | .....   | -C----- |
| B.NL.00.671_00T36      | AY423387     | U----  | A.....  | .....   | -----   |
| B.NL.86.3202A21        | U34604       | -----  | .....   | .....U  | -----   |
| B.NL.96.H434_42_A1     | AY970948     | N----  | A.....  | .....   | -----   |
| B.RU.04.04RU128005     | AY682547     | -----  | A.....  | UUUU    | -----   |
| B.RU.04.04RU129005     | AY751406     | -----  | .....   | .....   | -----   |
| B.RU.04.04RU139089     | AY751407     | -----  | UAAAA   | .....U  | -C----- |
| B.RU.04.04RU139095     | AY819715     | -----  | .....   | .....U  | -----   |
| B.TH.90.BK132          | AY173951     | -----  | .....   | .....   | -----   |
| B.TW.94.TWCYS          | AF086817     | -----  | .....   | .....U  | -----   |
| B.US.00.14294_1        | DQ853436     | -U--   | .....   | .....   | -----   |
| B.US.00.ES1_20         | EF363123     | -ΔΔ    | .....   | .....U  | -----   |
| B.US.04.ES10_53        | EF363127     | -----  | .....   | .....U  | -----   |
| B.US.04.ES4_24         | EF363124     | -----  | .....   | .....   | -----   |
| B.US.04.ES8_43         | EF363126     | G--Δ   | .....   | .....U  | -----   |
| B.US.83.5018_83        | AY835777     | -----  | .....   | .....   | -----   |
| B.US.83.5157_83        | AY835781     | -----  | .....   | .....   | -----   |
| B.US.83.RF.M17451      |              | G----  | .....   | .....   | -----   |
| B.US.83.SF2.K02007     |              | -ΔΔΔ   | .....   | .....U  | -----   |
| B.US.84.5019_84        | AY835779     | -----  | .....   | .....   | -----   |
| B.US.84.MNCG           | M17449       | -----  | .....   | .....U  | -C----- |
| B.US.84.NY5CG          | M38431       | -----  | .....   | .....   | -----   |
| B.US.84.SF33           | AY352275     | -----  | A.....  | .....   | -----   |
| B.US.85.5077_85        | AY835769     | -----  | .....   | .....   | -----   |
| B.US.85.Ba_L           | AB221005     | -----  | .....   | .....U  | -----   |
| B.US.86.5084_86        | AY835775     | -----  | .....   | .....   | -----   |
| B.US.86.5096_86        | AY835749     | -ΔΔ    | .....   | .....U  | -----   |
| B.US.86.5127_86        | AY835774     | -----  | .....   | .....   | -----   |
| B.US.86.AD87           | AF004394     | -----  | .....   | .....   | -----   |
| B.US.86.JRFL           | U63632       | -----  | .....   | .....   | -----   |
| B.US.86.YU_2           | M93258       | -----  | A.....  | .....U  | -----   |
| B.US.87.5113_87        | AY835758     | -----  | .....   | .....   | -----   |
| B.US.87.BC             | L02317       | -----  | .....   | .....   | -----   |
| B.US.88.5160_88        | AY835763     | -----  | .....   | .....   | -----   |
| B.US.88.WR27           | AF286365     | -U--   | .....   | .....   | -----   |
| B.US.89.P896           | U39362       | -ΔΔ    | .....   | .....UU | -----   |
| B.US.90.US1            | AY173952     | -----  | .....   | .....   | -----   |
| B.US.90.US2            | AY173953     | -----  | .....   | .....U  | -----   |
| B.US.90.US3            | AY173954     | -ΔΔ    | .....   | .....   | -----   |
| B.US.90.US4            | AY173955     | -ΔΔ    | .....   | .....U  | -----   |
| B.US.90.WCIPR          | U69591       | -----  | .....   | .....   | -----   |
| B.US.90.WEAU           | U160.U21135  | G--Δ   | .....   | .....   | -----   |
| B.US.91.5048_91        | AY835761     | -----  | .....   | .....   | -----   |
| B.US.91.DH12_3         | AF069140     | -----  | .....   | .....   | -----   |
| B.US.93.WCD32P0793     | DQ487188     | -----  | .....   | .....U  | -----   |
| B.US.93.WCM32P0793     | DQ487190     | -----  | .....   | .....   | -----   |
| B.US.94.5082_94        | AY835773     | -----  | .....   | .....   | -----   |
| B.US.95.5073_95        | AY835768     | -----  | .....   | .....   | -----   |
| B.US.96.5155_96        | AY835753     | -ΔΔ    | .....   | .....U  | -----   |
| B.US.97.ARES2          | AB078005     | -----  | .....   | .....   | -C----- |
| B.US.98.15384_1        | DQ853463     | -U--   | .....   | .....   | -----   |
| B.US.98.98USHVTN1925c1 | AY560107     | -----  | .....   | .....U  | -----   |
| B.US.98.98USHVTN3605c9 | AY560108     | -----  | .....   | .....U  | -----   |
| B.US.98.98USHVTN8229c6 | AY560109     | -----  | .....   | .....UU | -----   |
| B.US.98.98USHVTN941c1  | AY560110     | -----  | .....   | .....U  | -----   |
| B.US.98.WC3_0498_4     | EF175212     | G----  | .....   | .....   | -----   |
| B.ZA.03.03ZAPS045MB2   | DQ396398     | -ΔΔ    | .....   | .....U  | -----   |
